# Supplementary material for: Photoinduced formation of a platina-α-lactone – a carbon dioxide complex of platinum. Insights from femtosecond mid-infrared spectroscopy
Source: Royal Society of Chemistry journal article supplement (doi:10.1039/d4cp03840a), 2025-01-01
Supplement: d4cp03840a1.pdf [file d4cp03840a1.pdf]

## Supplementary Information

### Photoinduced formation of a platina- $\alpha$ -lactone – a carbon dioxide complex of platinum. Insights from femtosecond mid-infrared spectroscopy.

Markus Bauer<sup>†</sup>, Raphaela Post<sup>†</sup>, Luis I. Domenianni, and Peter Vöhringer<sup>\*a</sup>

#### Content:

TDDFT – natural transition orbitals of [Pt(chda)(C<sub>2</sub>O<sub>4</sub>)]

Infrared spectrum of carbon dioxide in DMSO

Fitting the pump-probe kinetics traces

Kinetic growth of the carbon dioxide absorption

DFT-energetics

DFT - natural bond orbitals of [Pt(chda)(CO<sub>2</sub>)]

DFT – NBO analysis for [Pt(chda)(CO<sub>2</sub>)]

CASSCF - Active space for [Pt(en)(CO<sub>2</sub>)]

CASSCF - natural bond orbitals of [Pt(en)(CO<sub>2</sub>)]

CASSCF – NBO analysis for [Pt(en)(CO<sub>2</sub>)]

Optimized geometries of [Pt(chda)(C<sub>2</sub>O<sub>4</sub>)] – singlet ground state from spin-restricted DFT

Optimized geometries of [Pt(chda)(C<sub>2</sub>O<sub>4</sub>)] – triplet states from spin-unrestricted DFT

Optimized geometry of [Pt(chda)(C<sub>2</sub>O<sub>4</sub>)] – open-shell singlet state from spin-unrestricted DFT

Optimized geometries of [Pt(chda)(C<sub>2</sub>O<sub>4</sub>)] – excited singlet state from TD-DFT

Optimized geometries of [Pt(chda)(C<sub>2</sub>O<sub>4</sub>)] – triplet states from TD-DFT with closed-shell reference

Optimized geometries of [Pt(chda)(CO<sub>2</sub>)] – singlet/triplet states from restricted/unrestricted DFT

Optimized geometry of [Pt(chda)(CO<sub>2</sub>)] – triplet states from TD-DFT with closed-shell reference

References

**Figure S1.** Natural transition orbitals, excitation wavelengths, and oscillator strengths of the twenty lowest singlet and triplet excitations at the relaxed geometry of the singlet ground state of oxaliplatin, [1]. Level of theory: B3LYP/GenECP

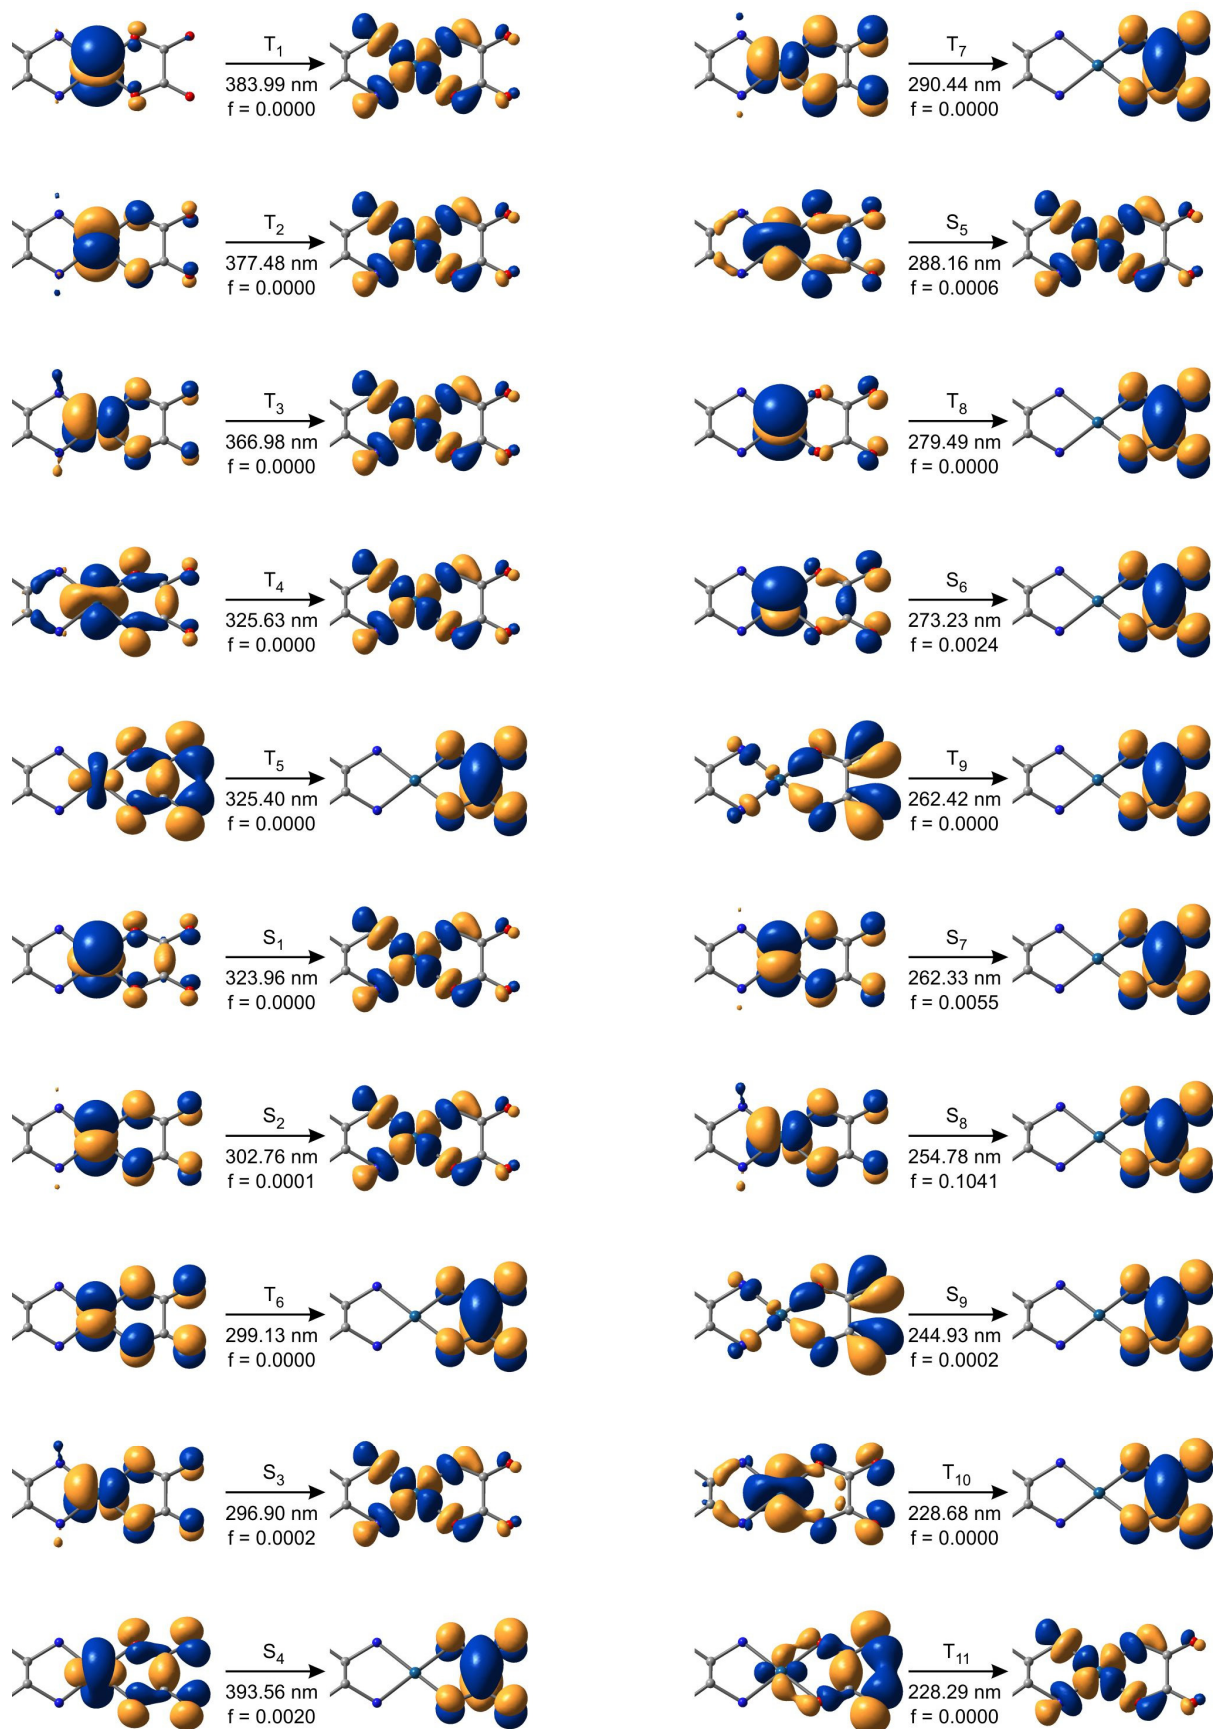

## Infrared spectrum of carbon dioxide in DMSO

To estimate the extinction coefficient of CO<sub>2</sub> in liquid DMSO solution, a volume of 10 mL of the pure solvent was filled into a round-bottom flask, which was closed with a rubber septum. The septum itself was pierced with two capillaries serving as gas inlet and outlet. The inlet capillary was connected to a frit, which in turn was immersed in the liquid. Gaseous CO<sub>2</sub> (purity 99.998% Air Liquide) was allowed to bubble through the solvent for about 20 minutes at a flow rate of 1 L/min while maintaining the total gas pressure above the liquid at 1 atm. According to Yin et al.<sup>1</sup> the Henry constant of CO<sub>2</sub> in DMSO amounts to 652 Pa m<sup>3</sup> mol<sup>-1</sup>. Accordingly, the saturation concentration of CO<sub>2</sub> in the solution was 0.153 mol L<sup>-1</sup>. The solution was transferred into an IR-transmission cell with an optical thickness of 50 μm and its infrared spectrum was measured with an 5700 FT-IR spectrometer (Thermo Electron Corp.) at a wavenumber resolution of 0.5 cm<sup>-1</sup>. As can be seen in Figure S3, a peak absorbance of this solution at 2337 cm<sup>-1</sup> was 0.78. Given the above concentration, we can use Lambert-Beer's law to derive a peak molar decadic extinction coefficient of  $\varepsilon(\text{CO}_2) = 1017 \text{ L mol}^{-1} \text{ cm}^{-1}$ .

**Figure S2.** FTIR-Spectrum of carbon dioxide dissolved in DMSO.

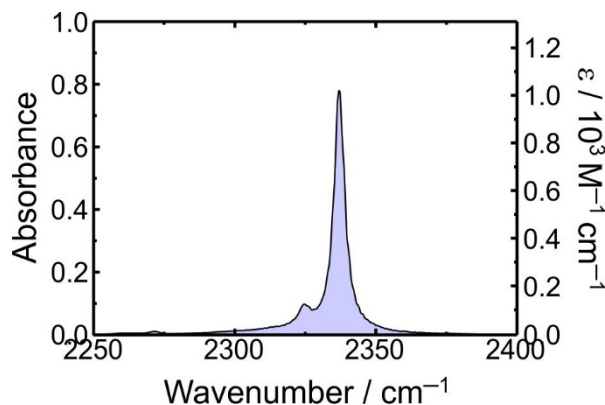

The peak extinction coefficient of oxaliplatin at 1702 cm<sup>-1</sup> is equal to  $\varepsilon([\mathbf{1}]) = 2424 \text{ L mol}^{-1} \text{ cm}^{-1}$ . The 1702 cm<sup>-1</sup>-bleaching amplitude after 200 ps, denoted here  $\Delta OD_\infty([\mathbf{1}])$ , corresponds to the absorption of all oxaliplatin complexes that have not returned to their ground state during this time window. If each of these molecules has been photochemically transformed into the product complex  $[\mathbf{2}]$  by losing a neutral CO<sub>2</sub>-molecule, the ratio of the asymptotic CO<sub>2</sub>-absorption at 2337 cm<sup>-1</sup>,  $\Delta OD_\infty(\text{CO}_2)$ , to the parent bleaching magnitude at 1702 cm<sup>-1</sup>,  $|\Delta OD_\infty([\mathbf{1}])|$ , is equal to the ratio of the peak extinction coefficients, i.e.  $\varepsilon(\text{CO}_2) / \varepsilon([\mathbf{1}]) = 1017 / 2424 = 0.42$ . This value is in excellent agreement with the absorption-to-bleach ratio of  $0.278 / 0.722 = 0.39$  that can be derived directly from the pump-probe data. The primary quantum yield for CO<sub>2</sub>-formation can be calculated from the 1702 cm<sup>-1</sup>-bleaching amplitude,  $\Delta OD_0([\mathbf{1}])$ , at the earliest delays (i.e. at 500 fs, the signal amplitude is 3.764). We then have  $\Phi(\text{CO}_2) = 0.278 \cdot 2424 / (3.764 \cdot 1017) = 18\%$ , in excellent agreement with a primary quantum yield for photoconversion of 15 % derived from the ratio,  $\Delta OD_0([\mathbf{1}]) / \Delta OD_\infty([\mathbf{1}])$  (cf. main paper).

## Fitting the pump-probe kinetics traces

**Table S1.** Optimized parameters of the nonlinear least-squares fits of the 266 nm-pump / IR-probe kinetic traces displayed in Figure 4 (main paper)

| $\tilde{\nu}_{probe}/cm^{-1}$ | $A_0$  | $A_1$  | $\tau_1/ps$ | $A_2$ | $\tau_2/ps$ | $A_3$ | $\tau_3/ps$ | $A_4$ | $\tau_4/ps$ |
|-------------------------------|--------|--------|-------------|-------|-------------|-------|-------------|-------|-------------|
| 2337                          | 0.250  | -0.250 | 60          |       |             |       |             |       |             |
| 1717                          | 0.105  | 0.040  | 100         | -1.05 | 5.1         |       |             | 0.5   | 0.65        |
| 1702                          | -0.570 | -0.400 | 50          | -3.80 | 4.7         | 1.1   | 0.9         |       |             |
| 1693                          | -0.045 |        |             | 1.48  | 5.6         | -3.0  | 1.5         | 1.25  | 0.4         |
| 1678                          | -0.240 | -0.180 | 50          | -1.00 | 6.5         | 0.45  | 1.3         |       |             |
| 1656                          | -0.045 |        |             | 1.15  | 5.0         | -0.8  | 1.2         |       |             |
| 1634                          | 0.030  |        |             |       |             | 1.37  | 2.4         | -0.6  | 0.6         |

## Kinetic growth of the carbon dioxide absorption

**Figure S3.** a) Comparison of the kinetic build-up of the  $\nu_3$ -absorption of carbon dioxide generated from oxaliplatin (blue circles, this work) and from  $[\text{Fe}(\text{cyclam})(\text{ox})]^+$  (gray circles, from Ref. <sup>2</sup>) Both data sets were recorded in DMSO solution. Within the signal-to-noise ratio, both kinetics are identical. The solid curve is the monoexponential fit with a rise time of 60 ps. b) Decay of the  $n = 1 \rightarrow 2$  absorption of the anti-symmetric stretching vibration of  $\text{CO}_2$  dissolved in DMSO obtained from a pure IR-pump/IR-probe experiment. The solid curve is a monoexponential fit (including convolution with the instrument response function) with a decay time of 22.5 ps.

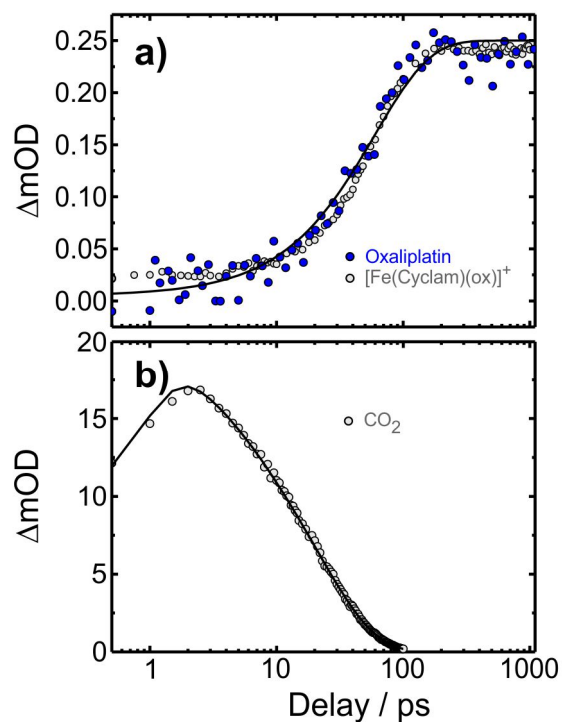

## DFT-energetics

**Figure S4.** Relative energies of the parent's excited states and the final product states. Singlet states are colored in blue, triplet states are colored in red. The gray dashed lines connect complementary singlet-triplet electronic configurations of the parent. Note, that the energy of the singlet metal-centered state with seesaw structure was obtained from a broken-symmetry calculation whereas those of the metal-centered singlet states with square-planar and T-shaped coordination were obtained from a TDDFT-calculation. The broken-symmetry solution is of course spin-contaminated with an  $\langle S^2 \rangle$ -value of 0.7983. We refrained here from carrying out the simple spin-projection correction according to Yamaguchi.<sup>3</sup>

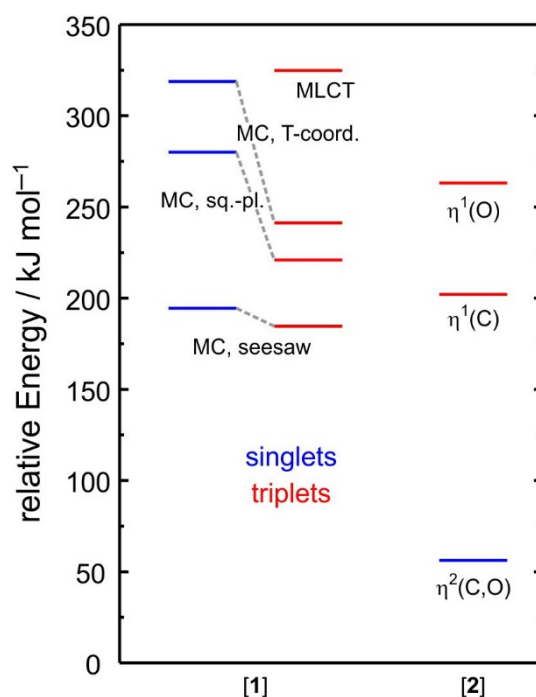

**Figure S5.** Natural bond orbitals, occupancies, and compositions for the product complex, (carbon dioxide)[(1R,2R)-cyclohexanediamine]platinum in its singlet ground state,  $^1[2]_{\text{trig.}} - \eta^2(\text{C},\text{O})$ . Level of theory: B3LYP/GenECP

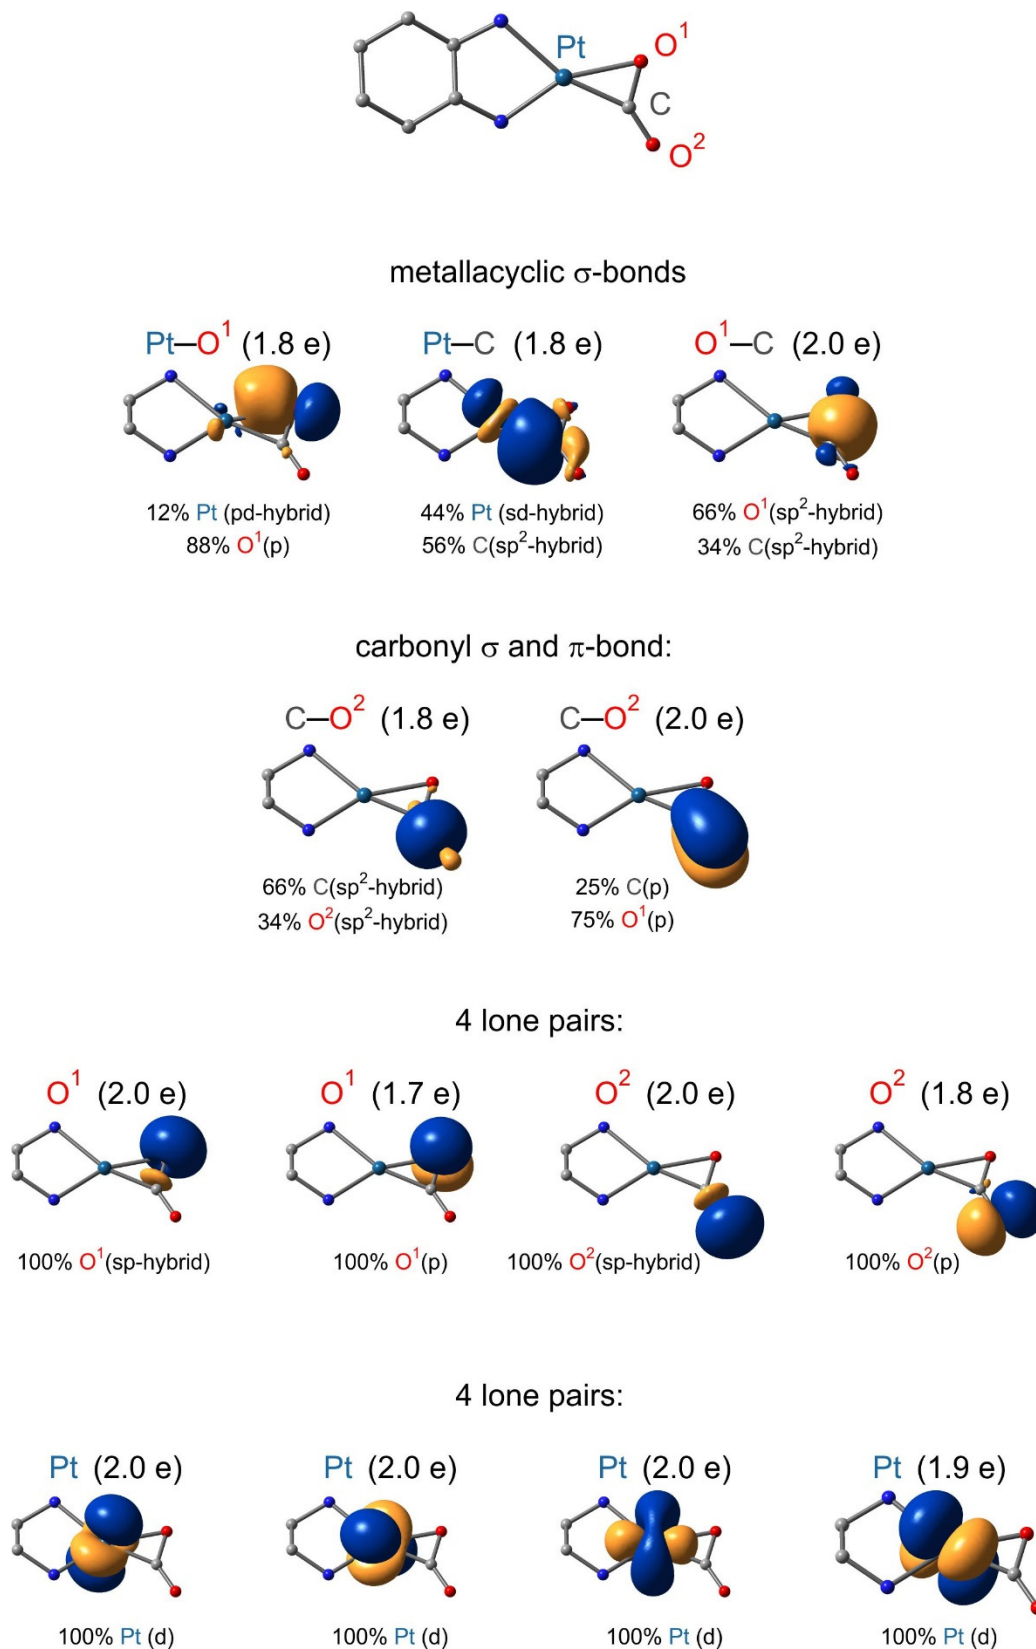

## NBO-analysis of [Pt(chda)(CO<sub>2</sub>)] – singlet ground state from spin-restricted DFT

Natural atomic orbital occupancies at Pt

| l <sub>ang</sub>   | AO-type  | Occupancy | energy   |
|--------------------|----------|-----------|----------|
| s                  | Cor( 5s) | 1.99669   | -3.84727 |
| p <sub>y</sub>     | Cor( 5p) | 1.99833   | -2.14044 |
| p <sub>x</sub>     | Cor( 5p) | 1.99330   | -2.13106 |
| p <sub>z</sub>     | Cor( 5p) | 1.99862   | -2.12371 |
| d <sub>xy</sub>    | Val( 5d) | 1.85940   | -0.26020 |
| d <sub>yz</sub>    | Val( 5d) | 1.96098   | -0.24363 |
| d <sub>xz</sub>    | Val( 5d) | 1.91385   | -0.24272 |
| d <sub>z2</sub>    | Val( 5d) | 1.85519   | -0.23021 |
| d <sub>x2-y2</sub> | Val( 5d) | 1.28249   | -0.22390 |
| s                  | Val( 6s) | 0.70086   | 0.07423  |
| p <sub>z</sub>     | Val( 6p) | 0.01231   | 0.08174  |
| p <sub>y</sub>     | Val( 6p) | 0.04631   | 0.31406  |
| p <sub>x</sub>     | Val( 6p) | 0.09532   | 0.40774  |
| accum. Rydberg     |          | 0.01276   |          |

Sum over NOA occupancies : 17.72641  
 Effective [core] electrons : 60  
 Total number of electrons : 77.72641  
 with [core] = [Kr] 4d<sup>10</sup> 4f<sup>14</sup>

Natural electron configuration:  
 Pt<sup>+0.27</sup> [core]<sup>60</sup> 5s<sup>2.00</sup> 5p<sup>5.99</sup> 5d<sup>8.87</sup> 6s<sup>0.70</sup> 6p<sup>0.15</sup>

Idealized natural electron configuration:  
**Pt<sup>0</sup> [core]<sup>60</sup> 5s<sup>2</sup> 5p<sup>6</sup> 5d<sup>9</sup> 6(sp)<sup>1</sup>**

1. (1.79248) BD( 1) Pt( 1) - O( 2)  
 ( 12.14%) 0.3484 \* Pt( 1) s( 6.33%) p 8.43( 53.43%) d 6.12( 38.74%) f 0.23( 1.49%)  
 ( 87.86%) 0.9373 \* O( 2) s( 5.27%) p17.95( 94.61%) d 0.02( 0.12%) f 0.00( 0.00%)
2. (1.83010) BD( 1) Pt( 1) - C( 3)  
 ( 44.06%) 0.6638 \* Pt( 1) s( 44.53%) p 0.23( 10.12%) d 1.02( 45.25%) f 0.00( 0.09%)  
 ( 55.94%) 0.7479 \* C( 3) s( 31.30%) p 2.19( 68.60%) d 0.00( 0.07%) f 0.00( 0.03%)
4. (1.99273) BD( 1) O( 2) - C( 3)  
 ( 66.38%) 0.8148 \* O( 2) s( 29.91%) p 2.34( 69.92%) d 0.01( 0.16%) f 0.00( 0.00%)  
 ( 33.62%) 0.5798 \* C( 3) s( 31.31%) p 2.19( 68.53%) d 0.01( 0.16%) f 0.00( 0.01%)
5. (1.99859) BD( 1) C( 3) - O( 4)  
 ( 24.64%) 0.4964 \* C( 3) s( 0.00%) p 1.00( 99.84%) d 0.00( 0.15%) f 0.00( 0.00%)  
 ( 75.36%) 0.8681 \* O( 4) s( 0.00%) p 1.00( 99.66%) d 0.00( 0.32%) f 0.00( 0.02%)
6. (1.99521) BD( 2) C( 3) - O( 4)  
 ( 35.23%) 0.5936 \* C( 3) s( 37.97%) p 1.63( 61.95%) d 0.00( 0.06%) f 0.00( 0.02%)  
 ( 64.77%) 0.8048 \* O( 4) s( 39.36%) p 1.53( 60.06%) d 0.01( 0.57%) f 0.00( 0.01%)
29. (1.99008) LP( 1) Pt( 1) s( 2.46%) p 0.01( 0.03%) d39.59( 97.51%) f 0.00( 0.00%)
30. (1.98567) LP( 2) Pt( 1) s( 4.27%) p 0.00( 0.02%) d22.40( 95.71%) f 0.00( 0.00%)
31. (1.97599) LP( 3) Pt( 1) s( 6.55%) p 0.05( 0.31%) d14.23( 93.14%) f 0.00( 0.00%)
32. (1.92327) LP( 4) Pt( 1) s( 0.00%) p 0.00( 0.01%) d 1.00( 99.99%) f 0.00( 0.00%)
33. (0.07733) LP\*( 5) Pt( 1) s( 3.17%) p29.57( 93.74%) d 0.84( 2.67%) f 0.13( 0.42%)
34. (0.01050) LP\*( 6) Pt( 1) s( 0.00%) p 1.00( 95.07%) d 0.01( 0.96%) f 0.04( 3.97%)
33. (0.07733) LP\*( 5) Pt( 1) s( 3.17%) p29.57( 93.74%) d 0.84( 2.67%) f 0.13( 0.42%)
34. (0.01050) LP\*( 6) Pt( 1) s( 0.00%) p 1.00( 95.07%) d 0.01( 0.96%) f 0.04( 3.97%)
35. (1.96571) LP( 1) O( 2) s( 64.80%) p 0.54( 35.19%) d 0.00( 0.02%) f 0.00( 0.00%)
36. (1.73737) LP( 2) O( 2) s( 0.00%) p 1.00( 99.84%) d 0.00( 0.15%) f 0.00( 0.01%)
37. (1.97160) LP( 1) O( 4) s( 60.06%) p 0.66( 39.87%) d 0.00( 0.07%) f 0.00( 0.00%)
38. (1.82162) LP( 2) O( 4) s( 0.46%) p99.99( 99.27%) d 0.56( 0.26%) f 0.04( 0.02%)
247. (0.24356) BD\*( 1) Pt( 1) - O( 2)  
 ( 87.86%) 0.9373 \* Pt( 1) s( 6.33%) p 8.43( 53.43%) d 6.12( 38.74%) f 0.23( 1.49%)  
 ( 12.14%) -0.3484 \* O( 2) s( 5.27%) p17.95( 94.61%) d 0.02( 0.12%) f 0.00( 0.00%)
248. (0.26839) BD\*( 1) Pt( 1) - C( 3)  
 ( 55.94%) 0.7479 \* Pt( 1) s( 44.53%) p 0.23( 10.12%) d 1.02( 45.25%) f 0.00( 0.09%)  
 ( 44.06%) -0.6638 \* C( 3) s( 31.30%) p 2.19( 68.60%) d 0.00( 0.07%) f 0.00( 0.03%)
250. (0.08519) BD\*( 1) O( 2) - C( 3)  
 ( 33.62%) 0.5798 \* O( 2) s( 29.91%) p 2.34( 69.92%) d 0.01( 0.16%) f 0.00( 0.00%)  
 ( 66.38%) -0.8148 \* C( 3) s( 31.31%) p 2.19( 68.53%) d 0.01( 0.16%) f 0.00( 0.01%)
251. (0.31439) BD\*( 1) C( 3) - O( 4)  
 ( 75.36%) 0.8681 \* C( 3) s( 0.00%) p 1.00( 99.84%) d 0.00( 0.15%) f 0.00( 0.00%)  
 ( 24.64%) -0.4964 \* O( 4) s( 0.00%) p 1.00( 99.66%) d 0.00( 0.32%) f 0.00( 0.02%)
252. (0.03723) BD\*( 2) C( 3) - O( 4)  
 ( 64.77%) 0.8048 \* C( 3) s( 37.97%) p 1.63( 61.95%) d 0.00( 0.06%) f 0.00( 0.02%)  
 ( 35.23%) -0.5936 \* O( 4) s( 39.36%) p 1.53( 60.06%) d 0.01( 0.57%) f 0.00( 0.01%)



**Figure S6.** CASSCF(18,12)-active space for the product complex mode, (carbon dioxide)(ethanediamine)platinum in its singlet ground state,  $^1[2]_{\text{trig.}} - \eta^2(\text{C},\text{O})$ .

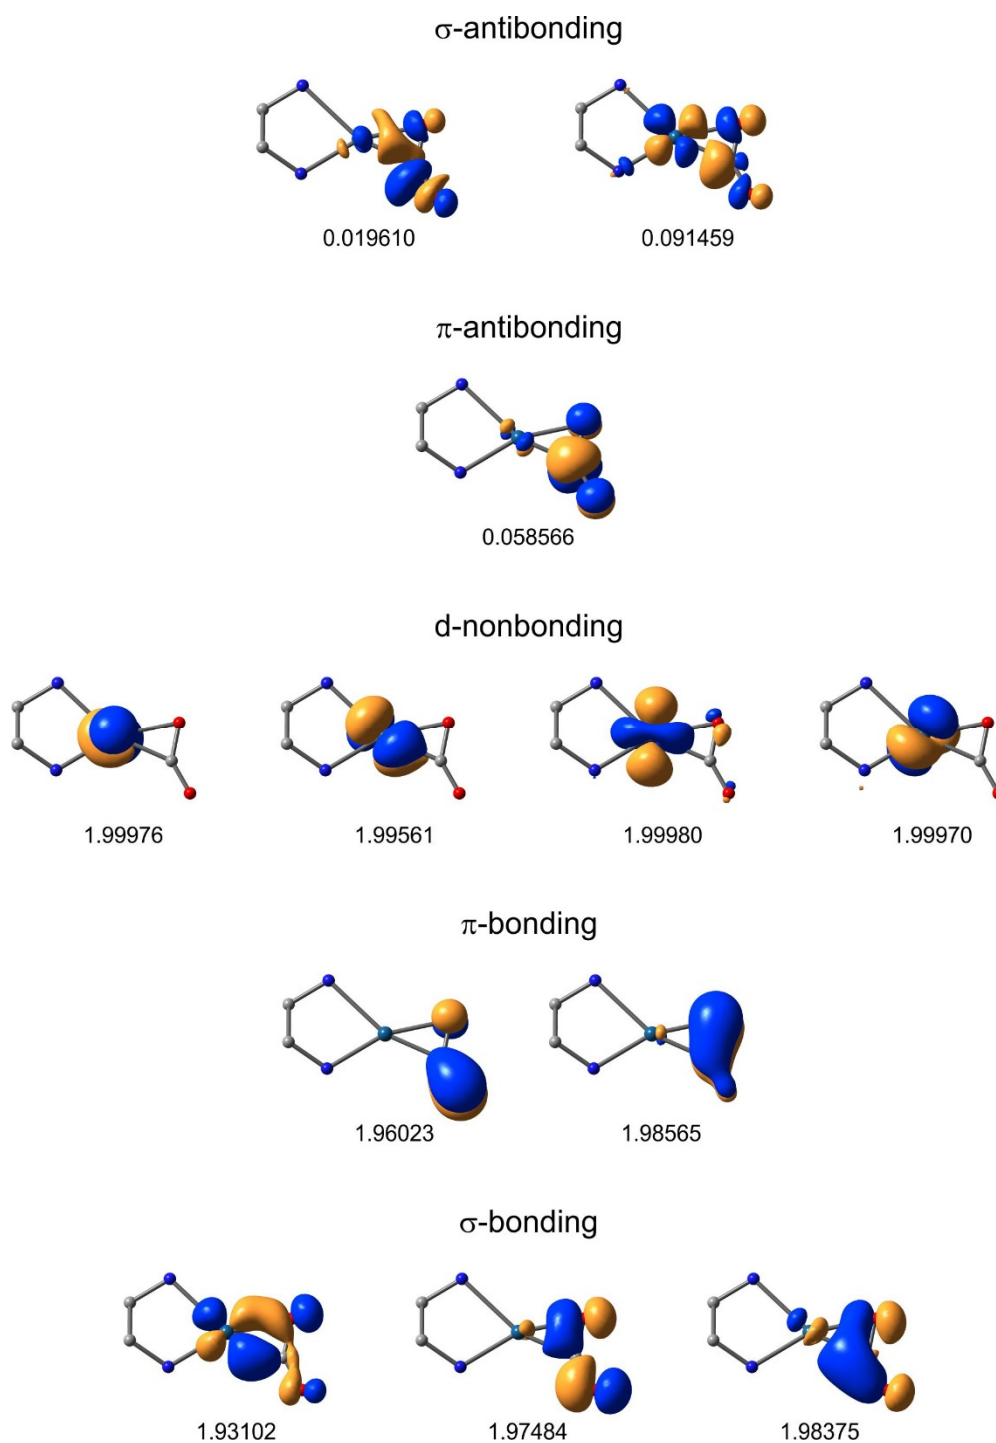

**Figure S7.** Natural bond orbitals, occupancies, and compositions for the product complex, (carbon dioxide)(ethylene diamine)platinum in its singlet ground state,  $^1[2]_{\text{trig.}} - \eta^2(\text{C},\text{O})$ . Level of theory: CASSCF(18,12)/GenECP

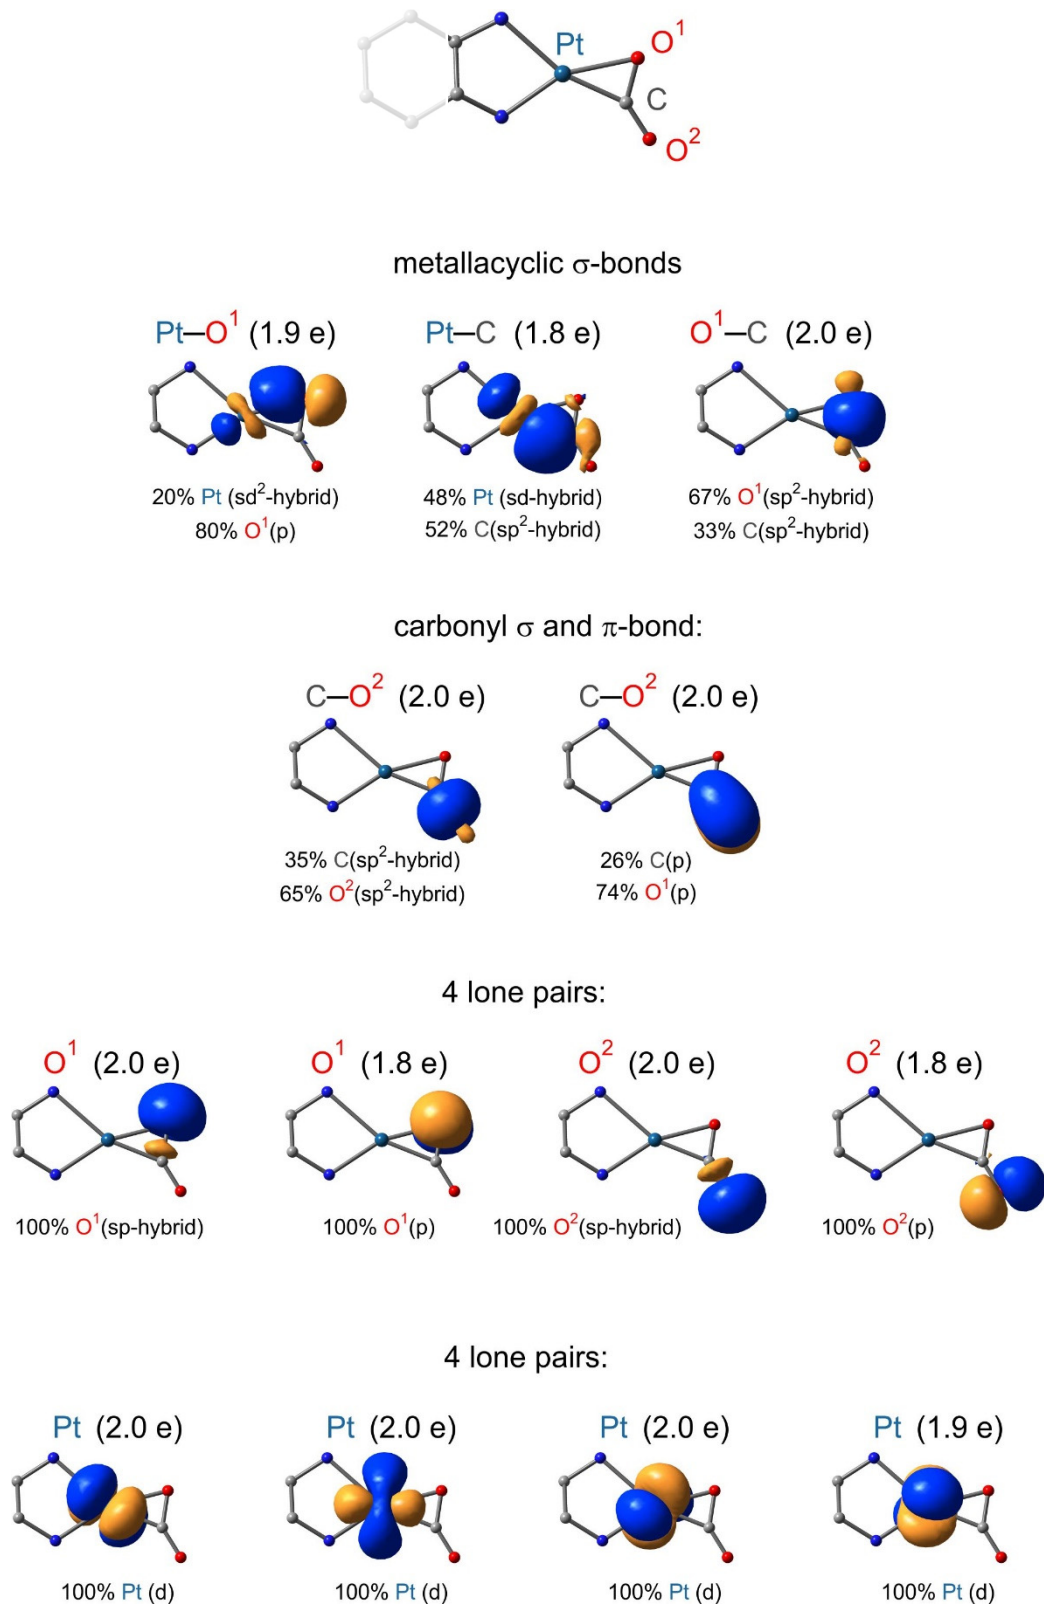

## NBO-analysis of [Pt(en)(CO<sub>2</sub>)] – singlet ground state from CAS(18,12)

Natural atomic orbital occupancies at Pt

| lang   | AO-type  | Occupancy | energy |
|--------|----------|-----------|--------|
| s      | Cor( 5s) | 1.99996   |        |
| py     | Cor( 5p) | 1.99986   |        |
| pz     | Cor( 5p) | 1.99984   |        |
| px     | Cor( 5p) | 1.99964   |        |
| dyz    | Val( 5d) | 1.96162   |        |
| dxz    | Val( 5d) | 1.95320   |        |
| dz2    | Val( 5d) | 1.86990   |        |
| dxy    | Val( 5d) | 1.84046   |        |
| dx2y2  | Val( 5d) | 1.33534   |        |
| s      | Val( 6s) | 0.63096   |        |
| px     | Ryd( 6p) | 0.00590   |        |
| dxy    | Ryd( 6d) | 0.00222   |        |
| pz     | Ryd( 6p) | 0.00220   |        |
| py     | Ryd( 6p) | 0.00190   |        |
| accum. | Rydberg  | 0.01276   |        |

Sum over NOA occupancies : 17.603  
 Effective [core] electrons : 60  
 Total number of electrons : 77.603  
 with [core] = [Kr] 4d<sup>10</sup> 4f<sup>14</sup>

Natural electron configuration:  
 Pt<sup>0.40</sup> [core]<sup>60</sup> 5s<sup>2.00</sup> 5p<sup>6.00</sup> 5d<sup>8.96</sup> 6s<sup>0.63</sup> 6p<sup>0.01</sup>

Idealized natural electron configuration:  
**Pt<sup>0</sup> [core]<sup>60</sup> 5s<sup>2</sup> 5p<sup>6</sup> 5d<sup>9</sup> 6s<sup>1</sup>**

|     |           |                      |            |                  |                 |                |  |  |  |
|-----|-----------|----------------------|------------|------------------|-----------------|----------------|--|--|--|
| 22. | (1.88206) | BD( 1) Pt(1) - O(2)  |            |                  |                 |                |  |  |  |
|     | ( 19.57%) | 0.4424 * Pt(1)       | s( 33.22%) | p 0.01( 0.32%)   | d 2.00( 66.33%) | f 0.00( 0.13%) |  |  |  |
|     | ( 80.43%) | 0.8968 * O(2)        | s( 4.28%)  | p 22.28( 95.33%) | d 0.09( 0.39%)  | f 0.00( 0.00%) |  |  |  |
| 23. | (1.81348) | BD( 1) Pt(1) - C(3)  |            |                  |                 |                |  |  |  |
|     | ( 48.01%) | 0.6929 * Pt(1)       | s( 53.43%) | p 0.01( 0.47%)   | d 0.86( 46.04%) | f 0.00( 0.06%) |  |  |  |
|     | ( 51.99%) | 0.7210 * C(3)        | s( 28.68%) | p 2.48( 70.98%)  | d 0.01( 0.30%)  | f 0.00( 0.05%) |  |  |  |
| 24. | (1.98890) | BD( 1) O(2) - C(3)   |            |                  |                 |                |  |  |  |
|     | ( 67.26%) | 0.8201 * O(2)        | s( 31.77%) | p 2.13( 67.56%)  | d 0.02( 0.66%)  | f 0.00( 0.01%) |  |  |  |
|     | ( 32.74%) | 0.5722 * C(3)        | s( 33.76%) | p 1.96( 66.03%)  | d 0.01( 0.17%)  | f 0.00( 0.04%) |  |  |  |
| 25. | (1.99892) | BD( 1) C(3) - O(4)   |            |                  |                 |                |  |  |  |
|     | ( 25.92%) | 0.5091 * C(3)        | s( 0.00%)  | p 1.00( 99.71%)  | d 0.00( 0.26%)  | f 0.00( 0.03%) |  |  |  |
|     | ( 74.08%) | 0.8607 * O(4)        | s( 0.00%)  | p 1.00( 99.57%)  | d 0.00( 0.41%)  | f 0.00( 0.01%) |  |  |  |
| 26. | (1.99444) | BD( 2) C(3) - O(4)   |            |                  |                 |                |  |  |  |
|     | ( 35.25%) | 0.5937 * C(3)        | s( 39.15%) | p 1.55( 60.69%)  | d 0.00( 0.11%)  | f 0.00( 0.05%) |  |  |  |
|     | ( 64.75%) | 0.8047 * O(4)        | s( 40.21%) | p 1.47( 59.03%)  | d 0.02( 0.74%)  | f 0.00( 0.02%) |  |  |  |
| 12. | (1.99422) | LP( 1) Pt(1)         | s( 4.50%)  | p 0.00( 0.01%)   | d21.22( 95.49%) | f 0.00( 0.00%) |  |  |  |
| 13. | (1.99100) | LP( 2) Pt(1)         | s( 1.37%)  | p 0.03( 0.04%)   | d72.09( 98.59%) | f 0.00( 0.00%) |  |  |  |
| 14. | (1.98544) | LP( 3) Pt(1)         | s( 6.88%)  | p 0.00( 0.01%)   | d13.53( 93.11%) | f 0.00( 0.00%) |  |  |  |
| 15. | (1.96248) | LP( 4) Pt(1)         | s( 0.00%)  | p 1.00( 0.02%)   | d99.99( 99.98%) | f 0.01( 0.00%) |  |  |  |
| 16. | (0.98806) | LP( 1) O(2)          | s( 63.88%) | p 0.56( 36.04%)  | d 0.00( 0.08%)  | f 0.00( 0.00%) |  |  |  |
| 17. | (0.88278) | LP( 2) O(2)          | s( 0.00%)  | p 1.00( 99.66%)  | d 0.00( 0.33%)  | f 0.00( 0.01%) |  |  |  |
| 18. | (0.98789) | LP( 1) O(4)          | s( 58.77%) | p 0.70( 41.12%)  | d 0.00( 0.11%)  | f 0.00( 0.00%) |  |  |  |
| 19. | (0.90504) | LP( 2) O(4)          | s( 0.91%)  | p99.99( 98.77%)  | d 0.34( 0.31%)  | f 0.02( 0.01%) |  |  |  |
| 38. | (0.35966) | BD*( 1) Pt(1) - O(2) |            |                  |                 |                |  |  |  |
|     | ( 80.43%) | 0.8968 * Pt(1)       | s( 33.22%) | p 0.01( 0.32%)   | d 2.00( 66.33%) | f 0.00( 0.13%) |  |  |  |
|     | ( 19.57%) | -0.4424 * O(2)       | s( 4.28%)  | p22.28( 95.33%)  | d 0.09( 0.39%)  | f 0.00( 0.00%) |  |  |  |
| 39. | (0.26206) | BD*( 1) Pt(1) - C(3) |            |                  |                 |                |  |  |  |
|     | ( 51.99%) | 0.7210 * Pt(1)       | s( 53.43%) | p 0.01( 0.47%)   | d 0.86( 46.04%) | f 0.00( 0.06%) |  |  |  |
|     | ( 48.01%) | -0.6929 * C(3)       | s( 28.68%) | p 2.48( 70.98%)  | d 0.01( 0.30%)  | f 0.00( 0.05%) |  |  |  |
| 40. | (0.07382) | BD*( 1) O(2) - C(3)  |            |                  |                 |                |  |  |  |
|     | ( 32.74%) | 0.5722 * O(2)        | s( 31.77%) | p 2.13( 67.56%)  | d 0.02( 0.66%)  | f 0.00( 0.01%) |  |  |  |
|     | ( 67.26%) | -0.8201 * C(3)       | s( 33.76%) | p 1.96( 66.03%)  | d 0.01( 0.17%)  | f 0.00( 0.04%) |  |  |  |
| 41. | (0.25764) | BD*( 1) C(3) - O(4)  |            |                  |                 |                |  |  |  |
|     | ( 74.08%) | 0.8607 * C(3)        | s( 0.00%)  | p 1.00( 99.71%)  | d 0.00( 0.26%)  | f 0.00( 0.03%) |  |  |  |
|     | ( 25.92%) | -0.5091 * O(4)       | s( 0.00%)  | p 1.00( 99.57%)  | d 0.00( 0.41%)  | f 0.00( 0.01%) |  |  |  |
| 42. | (0.02992) | BD*( 2) C(3) - O(4)  |            |                  |                 |                |  |  |  |
|     | ( 64.75%) | 0.8047 * C(3)        | s( 39.15%) | p 1.55( 60.69%)  | d 0.00( 0.11%)  | f 0.00( 0.05%) |  |  |  |
|     | ( 35.25%) | -0.5937 * O(4)       | s( 40.21%) | p 1.47( 59.03%)  | d 0.02( 0.74%)  | f 0.00( 0.02%) |  |  |  |

## Optimized geometry of [Pt(chda)(C<sub>2</sub>O<sub>4</sub>)] – singlet ground state from spin-restricted DFT

[1] (S<sub>0</sub>): E(RB3LYP) = -843.326113893 E<sub>h</sub>

|    |           |           |           |
|----|-----------|-----------|-----------|
| Pt | 0.033685  | 1.449387  | 0.164037  |
| O  | 0.388717  | 3.422508  | -0.169734 |
| C  | 1.646811  | 3.713917  | -0.308871 |
| O  | 2.069553  | 4.837457  | -0.519692 |
| O  | 2.058960  | 1.353827  | 0.027754  |
| C  | 2.625908  | 2.502478  | -0.188002 |
| O  | 3.829466  | 2.662093  | -0.293953 |
| N  | -2.020956 | 1.558772  | 0.328960  |
| N  | -0.313529 | -0.560584 | 0.473418  |
| H  | -2.256013 | 1.954883  | 1.238775  |
| H  | -2.421823 | 2.185225  | -0.365573 |
| H  | -0.174813 | -1.055772 | -0.407299 |
| H  | 0.351953  | -0.960260 | 1.131269  |
| C  | -2.612848 | 0.193530  | 0.197837  |
| C  | -1.709984 | -0.771278 | 0.960629  |
| C  | -4.060273 | 0.096995  | 0.672615  |
| H  | -2.560890 | -0.055843 | -0.873624 |
| C  | -2.196315 | -2.211695 | 0.828397  |
| H  | -1.707216 | -0.479644 | 2.022812  |
| C  | -4.564473 | -1.347500 | 0.552681  |
| H  | -4.116567 | 0.425463  | 1.725278  |
| H  | -4.691687 | 0.781405  | 0.084914  |
| C  | -3.652383 | -2.328123 | 1.297813  |
| H  | -1.541968 | -2.880440 | 1.408951  |
| H  | -2.120269 | -2.519701 | -0.229340 |
| H  | -5.593241 | -1.412879 | 0.938879  |
| H  | -4.608930 | -1.627355 | -0.514255 |
| H  | -4.004716 | -3.361349 | 1.155927  |
| H  | -3.700552 | -2.123622 | 2.381528  |

Square-planar coordination  
κ<sup>2</sup>(O<sup>1</sup>,O<sup>2</sup>) planar oxalate

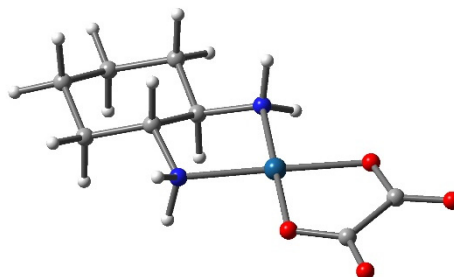

[1] (S<sub>0</sub>): E(RB3LYP) = -843.292815899 E<sub>h</sub>

|    |           |           |           |
|----|-----------|-----------|-----------|
| Pt | 0.048884  | 1.455673  | 0.155330  |
| O  | 2.107292  | 1.715359  | -0.050166 |
| C  | 1.953975  | 2.970396  | -0.222132 |
| O  | 0.747641  | 3.384786  | -0.191705 |
| O  | 4.273369  | 3.388218  | -0.410734 |
| C  | 3.155778  | 3.932808  | -0.450183 |
| O  | 2.841930  | 5.121218  | -0.641340 |
| N  | -2.003295 | 1.547349  | 0.331984  |
| N  | -0.317486 | -0.547577 | 0.474597  |
| H  | -2.223722 | 1.942135  | 1.246457  |
| H  | -2.397262 | 2.183638  | -0.357758 |
| H  | -0.174044 | -1.038905 | -0.407990 |
| H  | 0.354780  | -0.937794 | 1.131447  |
| C  | -2.609517 | 0.189993  | 0.197547  |
| C  | -1.711001 | -0.770754 | 0.963809  |
| C  | -4.057674 | 0.101717  | 0.669220  |
| H  | -2.556357 | -0.059702 | -0.873670 |
| C  | -2.191749 | -2.212280 | 0.831273  |
| H  | -1.710009 | -0.478038 | 2.025642  |
| C  | -4.560570 | -1.343911 | 0.549638  |
| H  | -4.116386 | 0.432425  | 1.720859  |
| H  | -4.686632 | 0.784657  | 0.077394  |
| C  | -3.650193 | -2.325218 | 1.296601  |
| H  | -1.540144 | -2.879636 | 1.416195  |
| H  | -2.112085 | -2.521845 | -0.225569 |
| H  | -5.589686 | -1.408879 | 0.934673  |
| H  | -4.603922 | -1.623933 | -0.517224 |
| H  | -4.003391 | -3.357870 | 1.153551  |
| H  | -3.700614 | -2.121014 | 2.380177  |

Square-planar coordination  
κ<sup>2</sup>(O<sup>1</sup>,O<sup>1'</sup>) planar oxalate

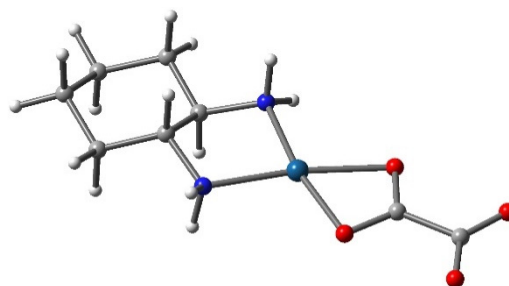

## Optimized geometries of [Pt(chda)(C<sub>2</sub>O<sub>4</sub>)] – triplet states from spin-unrestricted DFT

<sup>3</sup>-MC [1]<sub>seesaw</sub>: E(UB3LYP) = -843.252064947 E<sub>h</sub>

|    |           |           |           |
|----|-----------|-----------|-----------|
| Pt | 0.602766  | 1.086005  | 0.838281  |
| O  | 1.535381  | 2.951201  | 0.929348  |
| C  | 1.666877  | 3.596444  | -0.183565 |
| O  | 2.184713  | 4.701273  | -0.272448 |
| O  | 0.625708  | 1.711953  | -1.309073 |
| C  | 1.123445  | 2.884730  | -1.472741 |
| O  | 1.199239  | 3.464304  | -2.551895 |
| N  | -1.641416 | 1.506114  | 0.742754  |
| N  | -0.187762 | -0.895200 | 0.846095  |
| H  | -1.968515 | 1.845562  | 1.643237  |
| H  | -1.807064 | 2.235242  | 0.056755  |
| H  | -0.009315 | -1.317510 | -0.062783 |
| H  | 0.300617  | -1.474704 | 1.523399  |
| C  | -2.308492 | 0.242573  | 0.363323  |
| C  | -1.649002 | -0.908073 | 1.129177  |
| C  | -3.822100 | 0.263027  | 0.593094  |
| H  | -2.105669 | 0.097175  | -0.710521 |
| C  | -2.289575 | -2.255097 | 0.795292  |
| H  | -1.755623 | -0.706959 | 2.207583  |
| C  | -4.459510 | -1.087190 | 0.246881  |
| H  | -4.014002 | 0.500454  | 1.654783  |
| H  | -4.269977 | 1.073029  | -0.003443 |
| C  | -3.802694 | -2.226610 | 1.030807  |
| H  | -1.812419 | -3.045202 | 1.396394  |
| H  | -2.084775 | -2.489230 | -0.264864 |
| H  | -5.540868 | -1.051347 | 0.451571  |
| H  | -4.348344 | -1.276141 | -0.835308 |
| H  | -4.240857 | -3.195756 | 0.745860  |
| H  | -4.001413 | -2.093994 | 2.108787  |

Seesaw coordination  
κ<sup>2</sup>(O<sup>1</sup>,O<sup>2</sup>) planar oxalate

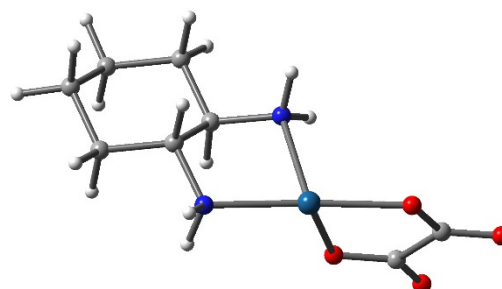

Spin density

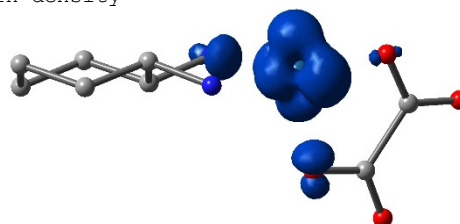

<sup>3</sup>-MC [1]<sub>sq.-pl.</sub>: E(UB3LYP) = -843.241935732 E<sub>h</sub>

|    |           |           |           |
|----|-----------|-----------|-----------|
| Pt | 0.131338  | 1.518893  | 0.154324  |
| O  | 0.652325  | 3.598197  | -0.200199 |
| C  | 1.902028  | 3.867472  | -0.339934 |
| O  | 2.344096  | 4.989257  | -0.573746 |
| O  | 2.378478  | 1.512971  | 0.028199  |
| C  | 2.901564  | 2.660122  | -0.194732 |
| O  | 4.108573  | 2.875500  | -0.299661 |
| N  | -2.181521 | 1.546464  | 0.333373  |
| N  | -0.382707 | -0.629966 | 0.438207  |
| H  | -2.419843 | 1.933933  | 1.242794  |
| H  | -2.591927 | 2.158419  | -0.363757 |
| H  | -0.281582 | -1.098443 | -0.459578 |
| H  | 0.281742  | -1.070782 | 1.066616  |
| C  | -2.696644 | 0.167806  | 0.199480  |
| C  | -1.764788 | -0.793850 | 0.948260  |
| C  | -4.143626 | 0.020545  | 0.679754  |
| H  | -2.644481 | -0.079580 | -0.874126 |
| C  | -2.258039 | -2.239535 | 0.850723  |
| H  | -1.739421 | -0.487595 | 2.007302  |
| C  | -4.632430 | -1.427389 | 0.576599  |
| H  | -4.198901 | 0.354670  | 1.731461  |
| H  | -4.789856 | 0.695176  | 0.096291  |
| C  | -3.703756 | -2.377582 | 1.337149  |
| H  | -1.585660 | -2.893663 | 1.428105  |
| H  | -2.191456 | -2.562514 | -0.203802 |
| H  | -5.661604 | -1.502089 | 0.961507  |
| H  | -4.670020 | -1.724508 | -0.486269 |
| H  | -4.037656 | -3.420614 | 1.221177  |
| H  | -3.748620 | -2.149422 | 2.416616  |

Square-planar coordination  
κ<sup>2</sup>(O<sup>1</sup>,O<sup>2</sup>) planar oxalate

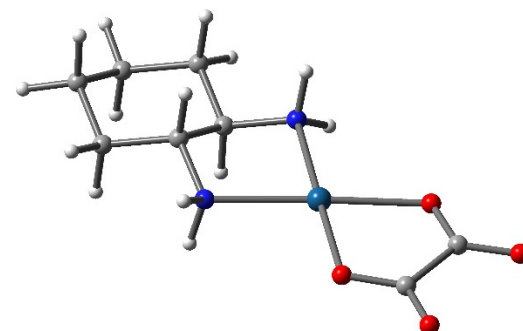

Spin density

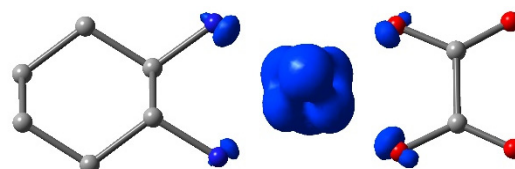

<sup>3</sup>-MC[1]<sub>T-coord.</sub>: E(UB3LYP) = -843.234200554 E<sub>h</sub>

|    |           |           |           |
|----|-----------|-----------|-----------|
| Pt | 0.437691  | 0.977899  | 0.144957  |
| O  | 3.237727  | 2.117387  | -0.266293 |
| C  | 2.427471  | 3.047366  | -0.281965 |
| O  | 1.142954  | 2.911457  | -0.153328 |
| O  | 3.179024  | 5.109670  | 0.599809  |
| C  | 2.891857  | 4.505266  | -0.457890 |
| O  | 2.947609  | 4.919573  | -1.637270 |
| N  | -1.824814 | 1.410956  | 0.342193  |
| N  | -0.352441 | -1.001065 | 0.394896  |
| H  | -1.964542 | 1.825809  | 1.260185  |
| H  | -2.132194 | 2.086271  | -0.349634 |
| H  | -0.339108 | -1.463352 | -0.513037 |
| H  | 0.242354  | -1.558163 | 1.002122  |
| C  | -2.540339 | 0.124671  | 0.213445  |
| C  | -1.742828 | -0.972358 | 0.927727  |
| C  | -3.976059 | 0.185742  | 0.744240  |
| H  | -2.559051 | -0.111857 | -0.863153 |
| C  | -2.435230 | -2.330633 | 0.807209  |
| H  | -1.654889 | -0.697089 | 1.991290  |
| C  | -4.675773 | -1.172804 | 0.632170  |
| H  | -3.944759 | 0.500455  | 1.802669  |
| H  | -4.533530 | 0.961009  | 0.195972  |
| C  | -3.872644 | -2.271370 | 1.334147  |
| H  | -1.850021 | -3.089751 | 1.349739  |
| H  | -2.441989 | -2.629521 | -0.256334 |
| H  | -5.688344 | -1.104200 | 1.059420  |
| H  | -4.799301 | -1.431673 | -0.433928 |
| H  | -4.357469 | -3.250510 | 1.197961  |
| H  | -3.853453 | -2.076171 | 2.420605  |

T-coordination

$\kappa^1(O^1)$  D<sub>2d</sub>-symmetrical (twisted) oxalate

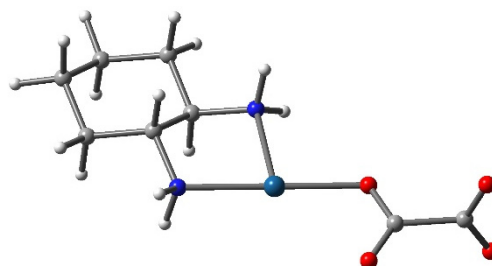

Spin density

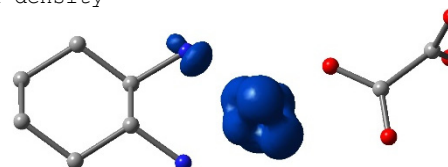

<sup>3</sup>-MLCT[1]<sub>sq.-pl.</sub>: E(UB3LYP) = -843.202410053 E<sub>h</sub>

|    |           |           |           |
|----|-----------|-----------|-----------|
| Pt | 0.060799  | 1.472145  | 0.174248  |
| O  | 0.336357  | 3.329079  | -0.154686 |
| C  | 1.719167  | 3.651461  | -0.326865 |
| O  | 1.964534  | 4.865814  | -0.533570 |
| O  | 2.044726  | 1.331124  | 0.012938  |
| C  | 2.616031  | 2.545845  | -0.230691 |
| O  | 3.857363  | 2.620355  | -0.352493 |
| N  | -2.029399 | 1.576154  | 0.364031  |
| N  | -0.305002 | -0.561968 | 0.505740  |
| H  | -2.261155 | 1.958108  | 1.280254  |
| H  | -2.435489 | 2.209853  | -0.320680 |
| H  | -0.153032 | -1.052996 | -0.376311 |
| H  | 0.360222  | -0.960166 | 1.165695  |
| C  | -2.605636 | 0.206820  | 0.213071  |
| C  | -1.709453 | -0.764749 | 0.978453  |
| C  | -4.059734 | 0.099429  | 0.666410  |
| H  | -2.538904 | -0.031304 | -0.860195 |
| C  | -2.193924 | -2.204780 | 0.832619  |
| H  | -1.713326 | -0.480048 | 2.042357  |
| C  | -4.558179 | -1.344855 | 0.526942  |
| H  | -4.132522 | 0.419376  | 1.720522  |
| H  | -4.683523 | 0.787056  | 0.074618  |
| C  | -3.655761 | -2.326935 | 1.280866  |
| H  | -1.546153 | -2.874998 | 1.418497  |
| H  | -2.102658 | -2.506967 | -0.225535 |
| H  | -5.592972 | -1.414794 | 0.895550  |
| H  | -4.584136 | -1.617254 | -0.542468 |
| H  | -4.002192 | -3.360490 | 1.128075  |
| H  | -3.720442 | -2.128420 | 2.364740  |

square-planar coordination

$\kappa^2(O^1, O^2)$  planar oxalate

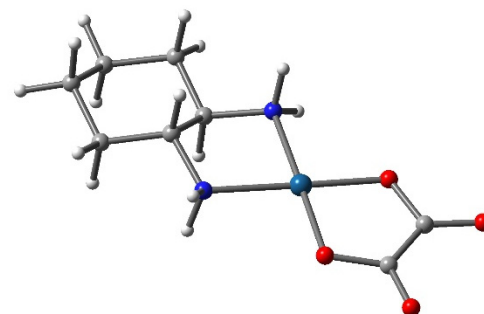

Spin density

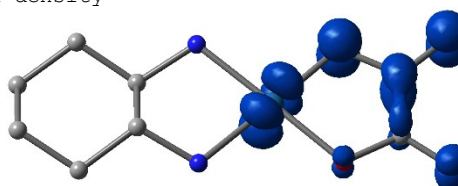

## Optimized geometry of [Pt(chda)(C<sub>2</sub>O<sub>4</sub>)] – open-shell singlet state from spin-unrestricted DFT

<sup>1</sup>-MC[1]<sub>seesaw</sub>: E(UB3LYP) = -843.255809591 E<sub>h</sub>

|    |           |           |           |
|----|-----------|-----------|-----------|
| Pt | -0.155887 | 1.993556  | 0.871827  |
| O  | 1.803292  | 2.697709  | 0.942823  |
| C  | 2.351168  | 3.040816  | -0.183393 |
| O  | 3.455317  | 3.560832  | -0.261555 |
| O  | 0.382663  | 2.207611  | -1.312561 |
| C  | 1.529649  | 2.749822  | -1.482781 |
| O  | 2.026956  | 3.014754  | -2.574894 |
| N  | -2.230855 | 1.691634  | 0.814130  |
| N  | -0.325742 | -0.304557 | 0.672625  |
| H  | -2.576557 | 1.882546  | 1.755510  |
| H  | -2.636123 | 2.397044  | 0.205832  |
| H  | -0.099234 | -0.533834 | -0.292714 |
| H  | 0.352727  | -0.783047 | 1.257803  |
| C  | -2.656560 | 0.331882  | 0.390639  |
| C  | -1.706178 | -0.686209 | 1.028605  |
| C  | -4.116005 | 0.042724  | 0.737805  |
| H  | -2.517697 | 0.292391  | -0.700693 |
| C  | -2.086134 | -2.116177 | 0.637894  |
| H  | -1.776258 | -0.579087 | 2.123179  |
| C  | -4.497435 | -1.391114 | 0.358224  |
| H  | -4.254655 | 0.187327  | 1.824772  |
| H  | -4.768359 | 0.770661  | 0.230673  |
| C  | -3.549251 | -2.411015 | 0.997772  |
| H  | -1.410264 | -2.823265 | 1.143399  |
| H  | -1.934235 | -2.240812 | -0.446922 |
| H  | -5.536466 | -1.591087 | 0.660031  |
| H  | -4.461247 | -1.498810 | -0.740560 |
| H  | -3.812678 | -3.431447 | 0.682109  |
| H  | -3.664595 | -2.378771 | 2.095204  |

Twisted seesaw coordination  
 $\kappa^2(O^1,O^2)$  planar oxalate

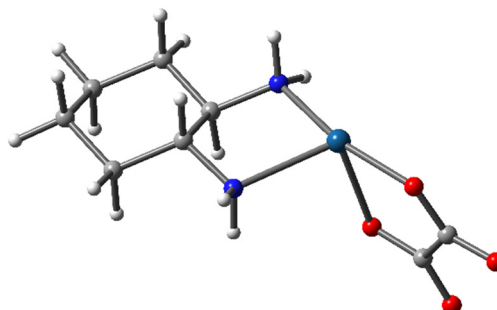

Spin density

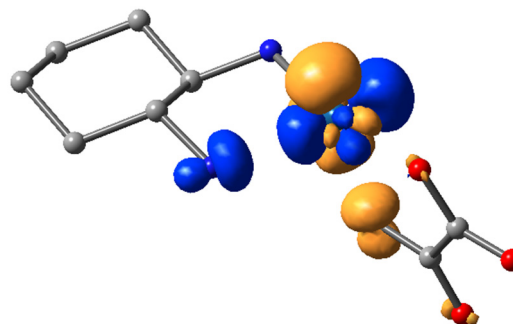

## Optimized geometries of [Pt(chda)(C<sub>2</sub>O<sub>4</sub>)] – excited singlet state from TD-DFT

<sup>1</sup>-MC [1]<sub>sq,-p1.</sub>: E(TD-B3LYP) = -843.219459407 E<sub>h</sub>

|    |           |           |           |
|----|-----------|-----------|-----------|
| Pt | 0.124144  | 1.515340  | 0.145528  |
| O  | 0.630330  | 3.633956  | -0.167837 |
| C  | 1.877106  | 3.900126  | -0.311630 |
| O  | 2.332038  | 5.018582  | -0.538157 |
| O  | 2.329483  | 1.538150  | 0.036131  |
| C  | 2.866760  | 2.682756  | -0.177792 |
| O  | 4.074991  | 2.881782  | -0.279013 |
| N  | -2.138907 | 1.521740  | 0.309464  |
| N  | -0.380242 | -0.667470 | 0.405638  |
| H  | -2.379333 | 1.920036  | 1.213911  |
| H  | -2.536793 | 2.134029  | -0.395095 |
| H  | -0.291993 | -1.125884 | -0.498185 |
| H  | 0.294165  | -1.107475 | 1.023359  |
| C  | -2.678176 | 0.149575  | 0.184049  |
| C  | -1.754074 | -0.817665 | 0.933527  |
| C  | -4.124555 | 0.031629  | 0.672019  |
| H  | -2.634512 | -0.103318 | -0.888453 |
| C  | -2.269146 | -2.256896 | 0.857940  |
| H  | -1.714709 | -0.501348 | 1.989255  |
| C  | -4.633035 | -1.411107 | 0.590562  |
| H  | -4.170705 | 0.380360  | 1.719317  |
| H  | -4.764003 | 0.706782  | 0.081796  |
| C  | -3.713041 | -2.364205 | 1.358173  |
| H  | -1.602388 | -2.912690 | 1.439805  |
| H  | -2.215625 | -2.595449 | -0.192273 |
| H  | -5.660785 | -1.466056 | 0.982375  |
| H  | -4.681130 | -1.721645 | -0.467992 |
| H  | -4.064852 | -3.403245 | 1.261427  |
| H  | -3.745409 | -2.118494 | 2.434281  |

Square-planar coordination  
κ<sup>2</sup>(O<sup>1</sup>,O<sup>2</sup>) planar oxalate

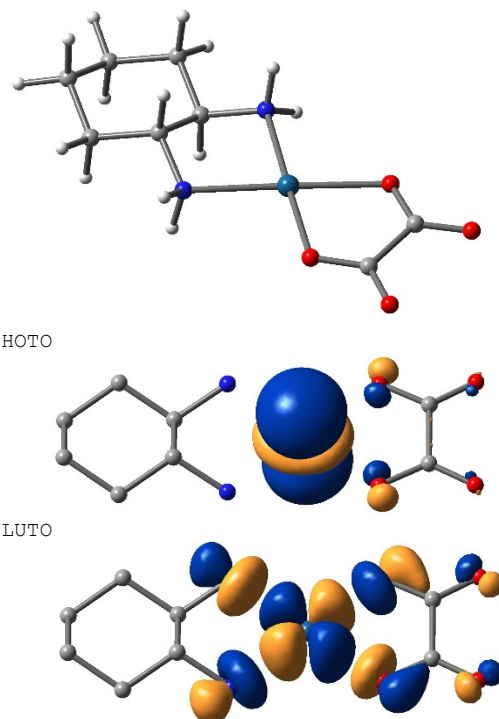

<sup>1</sup>-MC [1]<sub>T-coord.</sub>: E(TD-B3LYP) = -843.204697116 E<sub>h</sub>

|    |           |           |           |
|----|-----------|-----------|-----------|
| Pt | 0.385266  | 0.977908  | 0.082958  |
| O  | 3.142598  | 2.113422  | -0.295360 |
| C  | 2.346653  | 3.059001  | -0.329348 |
| O  | 1.062356  | 2.938087  | -0.244647 |
| O  | 3.106731  | 5.099794  | 0.594408  |
| C  | 2.849169  | 4.508520  | -0.477371 |
| O  | 2.954063  | 4.926510  | -1.651718 |
| N  | -1.758673 | 1.385391  | 0.404108  |
| N  | -0.338304 | -1.028727 | 0.428940  |
| H  | -1.857731 | 1.758695  | 1.346522  |
| H  | -2.078318 | 2.099464  | -0.244442 |
| H  | -0.302903 | -1.539411 | -0.451310 |
| H  | 0.269611  | -1.527889 | 1.071628  |
| C  | -2.503590 | 0.117574  | 0.238754  |
| C  | -1.732926 | -0.998522 | 0.949649  |
| C  | -3.946567 | 0.206352  | 0.742455  |
| H  | -2.506903 | -0.096624 | -0.842329 |
| C  | -2.445913 | -2.343300 | 0.807605  |
| H  | -1.654717 | -0.735457 | 2.016914  |
| C  | -4.662102 | -1.141285 | 0.595309  |
| H  | -3.931711 | 0.507134  | 1.804912  |
| H  | -4.478769 | 0.996188  | 0.190225  |
| C  | -3.893604 | -2.259804 | 1.304480  |
| H  | -1.886020 | -3.114087 | 1.359949  |
| H  | -2.435435 | -2.638129 | -0.256892 |
| H  | -5.684090 | -1.061371 | 0.997054  |
| H  | -4.761706 | -1.384776 | -0.476852 |
| H  | -4.393689 | -3.228348 | 1.149743  |
| H  | -3.894867 | -2.073293 | 2.392580  |

T-coordination  
κ<sup>1</sup>(O<sup>1</sup>) D<sub>2d</sub>-symmetrical (twisted) oxalate

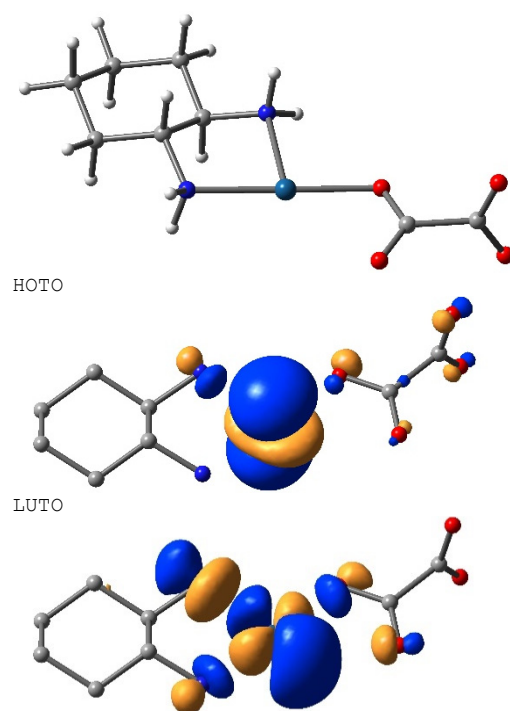



## Optimized geometries of [Pt(chda)(C<sub>2</sub>O<sub>4</sub>)] – triplet states from TD-DFT with closed-shell reference

<sup>3</sup>-MC[1]<sub>seesaw</sub>: E(TD-B3LYP) = -843.256707740 E<sub>h</sub>

|    |           |           |           |
|----|-----------|-----------|-----------|
| Pt | 0.604228  | 1.093952  | 0.874181  |
| O  | 1.371973  | 3.042652  | 0.924058  |
| C  | 1.566224  | 3.617546  | -0.216881 |
| O  | 2.018754  | 4.748239  | -0.340117 |
| O  | 0.735690  | 1.603519  | -1.299487 |
| C  | 1.186130  | 2.789367  | -1.497559 |
| O  | 1.333109  | 3.302568  | -2.603149 |
| N  | -1.636999 | 1.515147  | 0.791172  |
| N  | -0.173871 | -0.897531 | 0.861283  |
| H  | -1.955791 | 1.829908  | 1.703716  |
| H  | -1.820046 | 2.260716  | 0.127660  |
| H  | 0.010681  | -1.303201 | -0.054005 |
| H  | 0.303261  | -1.494233 | 1.531380  |
| C  | -2.300453 | 0.258012  | 0.390381  |
| C  | -1.640061 | -0.910525 | 1.130126  |
| C  | -3.812777 | 0.275989  | 0.629473  |
| H  | -2.103388 | 0.134919  | -0.687280 |
| C  | -2.284469 | -2.245768 | 0.755462  |
| H  | -1.754071 | -0.737616 | 2.212670  |
| C  | -4.458035 | -1.060275 | 0.249242  |
| H  | -3.996511 | 0.484245  | 1.698827  |
| H  | -4.260301 | 1.105421  | 0.059864  |
| C  | -3.797774 | -2.223382 | 0.994548  |
| H  | -1.808650 | -3.055964 | 1.330155  |
| H  | -2.081658 | -2.446359 | -0.312036 |
| H  | -5.537425 | -1.026897 | 0.464866  |
| H  | -4.357358 | -1.217032 | -0.839046 |
| H  | -4.237312 | -3.182911 | 0.680646  |
| H  | -3.993744 | -2.124433 | 2.076634  |

Twisted seesaw coordination  
κ<sup>2</sup>(O<sup>1</sup>,O<sup>2</sup>) planar oxalate

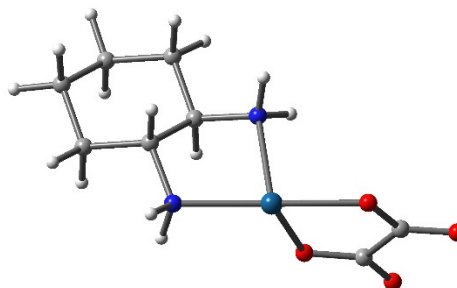

HOTO

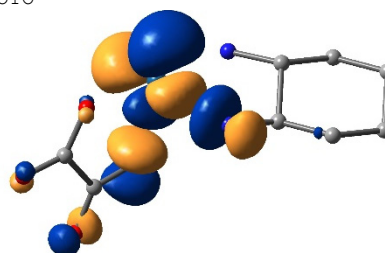

LUTO

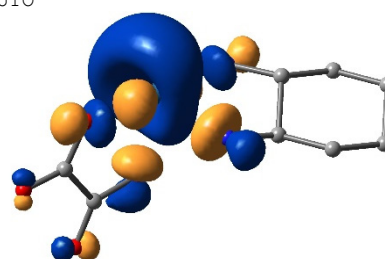

<sup>3</sup>-MC[1]<sub>sq.-pl.</sub>: E(TD-B3LYP) = -843.244370805 E<sub>h</sub>

|    |           |           |           |
|----|-----------|-----------|-----------|
| Pt | 0.130845  | 1.517808  | 0.155717  |
| O  | 0.651268  | 3.600412  | -0.190342 |
| C  | 1.900676  | 3.868838  | -0.333165 |
| O  | 2.343484  | 4.991353  | -0.563485 |
| O  | 2.377828  | 1.512075  | 0.024049  |
| C  | 2.900224  | 2.659727  | -0.196877 |
| O  | 4.107029  | 2.875175  | -0.306447 |
| N  | -2.180680 | 1.546781  | 0.334094  |
| N  | -0.382310 | -0.632838 | 0.431873  |
| H  | -2.423338 | 1.932023  | 1.243078  |
| H  | -2.593162 | 2.158433  | -0.361849 |
| H  | -0.286395 | -1.101625 | -0.466088 |
| H  | 0.282110  | -1.078127 | 1.056930  |
| C  | -2.695217 | 0.167734  | 0.197906  |
| C  | -1.763269 | -0.793993 | 0.946411  |
| C  | -4.142751 | 0.020503  | 0.675893  |
| H  | -2.641595 | -0.078911 | -0.875848 |
| C  | -2.258037 | -2.239350 | 0.854469  |
| H  | -1.734915 | -0.484847 | 2.004595  |
| C  | -4.631459 | -1.427496 | 0.575923  |
| H  | -4.199947 | 0.357225  | 1.726707  |
| H  | -4.788018 | 0.693852  | 0.089807  |
| C  | -3.703775 | -2.375019 | 1.341080  |
| H  | -1.585889 | -2.891552 | 1.434358  |
| H  | -2.191562 | -2.566630 | -0.198754 |
| H  | -5.661345 | -1.501330 | 0.959014  |
| H  | -4.666865 | -1.727997 | -0.486093 |
| H  | -4.038171 | -3.418362 | 1.229662  |
| H  | -3.749155 | -2.141968 | 2.419513  |

square-planar coordination  
κ<sup>2</sup>(O<sup>1</sup>,O<sup>2</sup>) planar oxalate

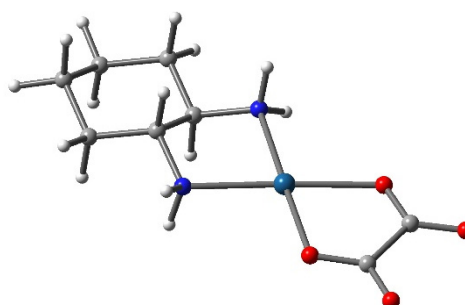

HOTO

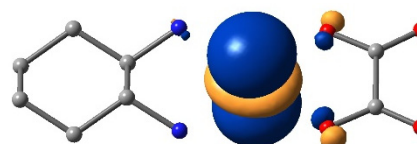

LUTO

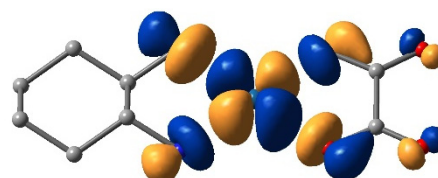

$^3\text{-MLCT}[\mathbf{1}]_{\text{T-coord.}}$ : E(TD-B3LYP) = -843.235290898 E<sub>h</sub>

|    |           |           |           |
|----|-----------|-----------|-----------|
| Pt | 0.435588  | 0.991148  | 0.149142  |
| O  | 3.223616  | 2.108867  | -0.254367 |
| C  | 2.425971  | 3.050966  | -0.277550 |
| O  | 1.140724  | 2.931327  | -0.150478 |
| O  | 3.206303  | 5.107682  | 0.592596  |
| C  | 2.912998  | 4.499764  | -0.461629 |
| O  | 2.977585  | 4.906141  | -1.643552 |
| N  | -1.836948 | 1.415254  | 0.345624  |
| N  | -0.354553 | -0.992288 | 0.390169  |
| H  | -1.981027 | 1.827150  | 1.263930  |
| H  | -2.148982 | 2.090237  | -0.344068 |
| H  | -0.344081 | -1.450591 | -0.519629 |
| H  | 0.241144  | -1.553657 | 0.992404  |
| C  | -2.546038 | 0.126227  | 0.213955  |
| C  | -1.743525 | -0.968319 | 0.926557  |
| C  | -3.982659 | 0.180043  | 0.742991  |
| H  | -2.562633 | -0.109311 | -0.862980 |
| C  | -2.431434 | -2.329066 | 0.808320  |
| H  | -1.654212 | -0.692320 | 1.989912  |
| C  | -4.676508 | -1.181368 | 0.631786  |
| H  | -3.953909 | 0.495776  | 1.801236  |
| H  | -4.543007 | 0.952665  | 0.193808  |
| C  | -3.868749 | -2.275233 | 1.335824  |
| H  | -1.842823 | -3.085381 | 1.351160  |
| H  | -2.437748 | -2.629181 | -0.254909 |
| H  | -5.689844 | -1.116975 | 1.057873  |
| H  | -4.797732 | -1.442323 | -0.434106 |
| H  | -4.349540 | -3.256694 | 1.202034  |
| H  | -3.850070 | -2.077524 | 2.421874  |

T-coordination

$\kappa^1(\text{O}^1)$  D<sub>2d</sub>-symmetrical (twisted) oxalate

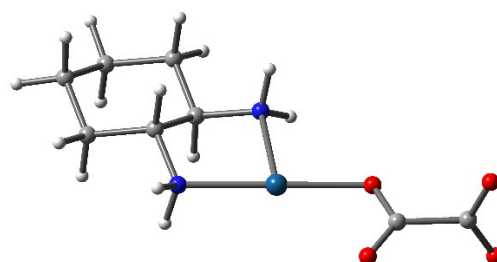

HOTO

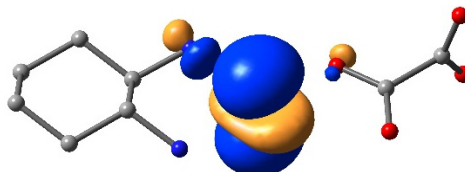

LUTO

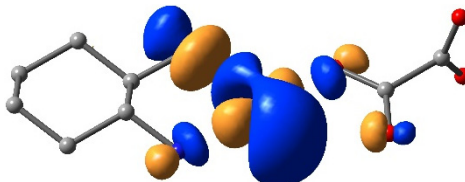

$^3\text{-MLCT}[\mathbf{1}]_{\text{sq.-pl.}}$ : E(TD-B3LYP) = -843.204685377 E<sub>h</sub>

|    |           |           |           |
|----|-----------|-----------|-----------|
| Pt | 0.059464  | 1.467645  | 0.174682  |
| O  | 0.327857  | 3.324848  | -0.149066 |
| C  | 1.705623  | 3.643845  | -0.321999 |
| O  | 1.955455  | 4.854196  | -0.529590 |
| O  | 2.043113  | 1.322732  | 0.014890  |
| C  | 2.607079  | 2.539067  | -0.228810 |
| O  | 3.847353  | 2.624949  | -0.354747 |
| N  | -2.025026 | 1.576750  | 0.361858  |
| N  | -0.302800 | -0.560400 | 0.505266  |
| H  | -2.258098 | 1.960459  | 1.276949  |
| H  | -2.428991 | 2.210032  | -0.324453 |
| H  | -0.150563 | -1.050696 | -0.377245 |
| H  | 0.362753  | -0.959399 | 1.164385  |
| C  | -2.603076 | 0.207857  | 0.211997  |
| C  | -1.707464 | -0.763850 | 0.977863  |
| C  | -4.057016 | 0.101954  | 0.665713  |
| H  | -2.536498 | -0.030936 | -0.861136 |
| C  | -2.192293 | -2.203567 | 0.832202  |
| H  | -1.711351 | -0.479005 | 2.041697  |
| C  | -4.556325 | -1.342163 | 0.527259  |
| H  | -4.129284 | 0.422605  | 1.719639  |
| H  | -4.680511 | 0.789579  | 0.073634  |
| C  | -3.654082 | -2.324634 | 1.280986  |
| H  | -1.544744 | -2.874011 | 1.418048  |
| H  | -2.101437 | -2.505893 | -0.225943 |
| H  | -5.590885 | -1.411290 | 0.896629  |
| H  | -4.583212 | -1.614980 | -0.542011 |
| H  | -4.001289 | -3.357964 | 1.128594  |
| H  | -3.718147 | -2.125838 | 2.364844  |

Square-planar structure

$\kappa^2(\text{O}^1, \text{O}^2)$  planar oxalate

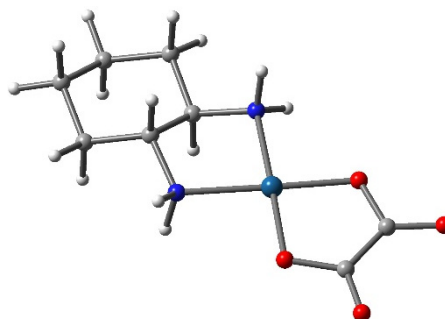

HOTO

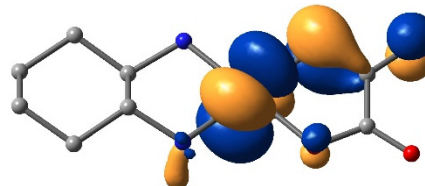

LUTO

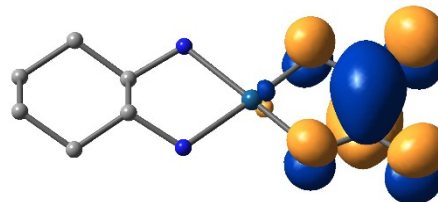

## Optimized geometries of [Pt(chda)(CO<sub>2</sub>)] – singlet/triplet states from restricted/unrestricted DFT

[2] (S<sub>0</sub>): E(RB3LYP) = -654.630620198 E<sub>h</sub>

|    |           |           |           |
|----|-----------|-----------|-----------|
| Pt | 0.075283  | 1.557534  | -0.069986 |
| O  | 1.326201  | 3.252238  | -0.386693 |
| C  | 1.916103  | 2.101279  | -0.339327 |
| O  | 3.078555  | 1.759025  | -0.443641 |
| N  | -2.212358 | 1.603765  | 0.186017  |
| N  | -0.379320 | -0.459076 | 0.194408  |
| H  | -2.417885 | 2.021856  | 1.090152  |
| H  | -2.670989 | 2.184329  | -0.507755 |
| H  | -0.342498 | -0.915673 | -0.715909 |
| H  | 0.344696  | -0.897702 | 0.756536  |
| C  | -2.728344 | 0.219923  | 0.133113  |
| C  | -1.711507 | -0.692813 | 0.817895  |
| C  | -4.118129 | 0.045206  | 0.748989  |
| H  | -2.767869 | -0.058430 | -0.933385 |
| C  | -2.143348 | -2.157478 | 0.768875  |
| H  | -1.614418 | -0.373621 | 1.868115  |
| C  | -4.564236 | -1.421223 | 0.717167  |
| H  | -4.085729 | 0.401415  | 1.794553  |
| H  | -4.837737 | 0.685789  | 0.215050  |
| C  | -3.534011 | -2.334231 | 1.389691  |
| H  | -1.400102 | -2.782222 | 1.289233  |
| H  | -2.162978 | -2.488488 | -0.284956 |
| H  | -5.545339 | -1.524128 | 1.206850  |
| H  | -4.700910 | -1.736187 | -0.332373 |
| H  | -3.844465 | -3.387904 | 1.312446  |
| H  | -3.482228 | -2.098577 | 2.467190  |
| H  | -4.348344 | -1.276141 | -0.835308 |

Trigonal / square-planar coordination  
 $\eta^2(\text{O,C})$  CO<sub>2</sub> neutral / carbonite dianion

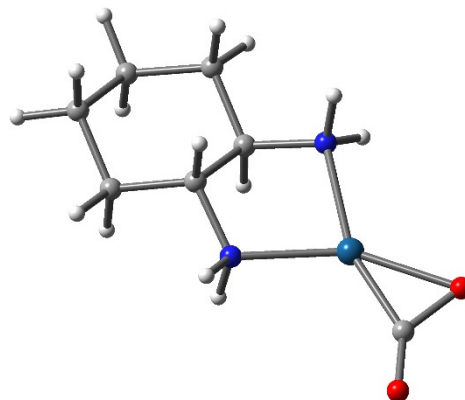

[2] (T<sub>1</sub>): E(UB3LYP) = -654.575075388 E<sub>h</sub>

|    |           |           |           |
|----|-----------|-----------|-----------|
| Pt | 0.138960  | 1.488187  | -0.062840 |
| O  | 1.585928  | 3.858511  | -0.525790 |
| C  | 1.810177  | 2.649332  | -0.401364 |
| O  | 2.834087  | 1.950956  | -0.435741 |
| N  | -2.084640 | 1.515940  | 0.199011  |
| N  | -0.361117 | -0.675641 | 0.223587  |
| H  | -2.267751 | 1.938173  | 1.106303  |
| H  | -2.512952 | 2.119232  | -0.495455 |
| H  | -0.333577 | -1.122758 | -0.689876 |
| H  | 0.347631  | -1.125846 | 0.793586  |
| C  | -2.658630 | 0.150241  | 0.136959  |
| C  | -1.701003 | -0.818441 | 0.835233  |
| C  | -4.065222 | 0.064255  | 0.733914  |
| H  | -2.697003 | -0.121039 | -0.930927 |
| C  | -2.232928 | -2.252573 | 0.796234  |
| H  | -1.597040 | -0.498193 | 1.885011  |
| C  | -4.600298 | -1.371821 | 0.702007  |
| H  | -4.024435 | 0.420252  | 1.779159  |
| H  | -4.737734 | 0.745262  | 0.188948  |
| C  | -3.639086 | -2.339131 | 1.399031  |
| H  | -1.535093 | -2.916206 | 1.330935  |
| H  | -2.258210 | -2.591677 | -0.254854 |
| H  | -5.594248 | -1.408682 | 1.174818  |
| H  | -4.737887 | -1.685544 | -0.347718 |
| H  | -4.012613 | -3.372626 | 1.327170  |
| H  | -3.588876 | -2.095558 | 2.474914  |
| H  | -4.348344 | -1.276141 | -0.835308 |

Trigonal-planar coordination  
 $\eta^1(\text{C})$  carbon dioxide radical anion

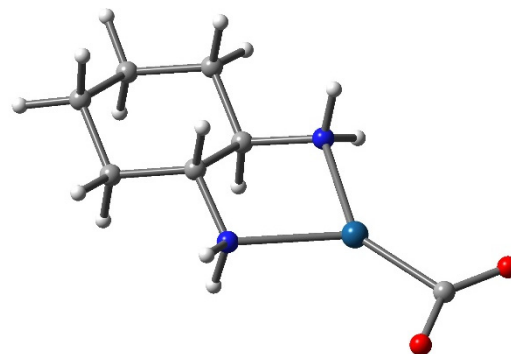

Spin density

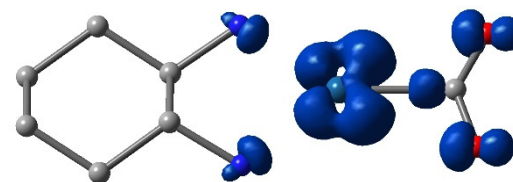

This is clearly a carbon dioxide radical anion that is ferromagnetically coupled to a platinum(I) center!

[2] (T<sub>2</sub>): E(RB3LYP) = -654.551846618 E<sub>h</sub>

|    |           |           |           |
|----|-----------|-----------|-----------|
| Pt | -0.461959 | 2.186667  | 0.225388  |
| O  | 1.543657  | 2.737648  | 0.056298  |
| C  | 2.183224  | 2.421675  | -0.994250 |
| O  | 3.340489  | 2.606008  | -1.307804 |
| N  | -2.483135 | 1.772310  | 0.481339  |
| N  | -0.397385 | -0.095213 | 0.321096  |
| H  | -2.746952 | 2.027435  | 1.432003  |
| H  | -3.057711 | 2.347346  | -0.129181 |
| H  | -0.262231 | -0.450921 | -0.621729 |
| H  | 0.373128  | -0.437939 | 0.884926  |
| C  | -2.802224 | 0.333203  | 0.250557  |
| C  | -1.697911 | -0.528390 | 0.870347  |
| C  | -4.182534 | -0.050176 | 0.784256  |
| H  | -2.776498 | 0.186057  | -0.841294 |
| C  | -1.983543 | -2.018695 | 0.667030  |
| H  | -1.666487 | -0.311544 | 1.950974  |
| C  | -4.464385 | -1.542406 | 0.579621  |
| H  | -4.222914 | 0.188297  | 1.862373  |
| H  | -4.951798 | 0.565143  | 0.290844  |
| C  | -3.364873 | -2.403941 | 1.207350  |
| H  | -1.192435 | -2.609853 | 1.154905  |
| H  | -1.932106 | -2.243510 | -0.413437 |
| H  | -5.446768 | -1.797563 | 1.006910  |
| H  | -4.524795 | -1.756140 | -0.502003 |
| H  | -3.556353 | -3.471781 | 1.017600  |
| H  | -3.376700 | -2.270787 | 2.303578  |

T-coordination

$\eta^1(\text{O})$  bent carbon dioxide radical anion

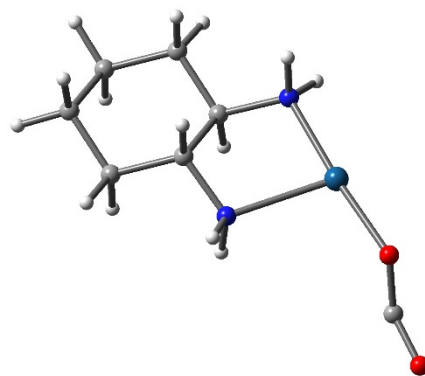

Spin density

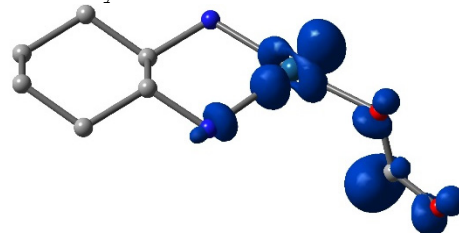

This is clearly a carbon dioxide radical anion that is ferromagnetically coupled to a platinum(I) center!

### Optimized geometry of [Pt(chda)(CO<sub>2</sub>)] – triplet states from TD-DFT with closed-shell reference

[2] (T<sub>0</sub>): E(TD-B3LYP) = -654.572972478 E<sub>h</sub>

|    |           |           |           |
|----|-----------|-----------|-----------|
| Pt | 0.117664  | 1.498089  | -0.059860 |
| O  | 1.603032  | 3.847072  | -0.566545 |
| C  | 1.808194  | 2.638832  | -0.420070 |
| O  | 2.816764  | 1.917484  | -0.438837 |
| N  | -2.084689 | 1.517536  | 0.213358  |
| N  | -0.360202 | -0.662068 | 0.235013  |
| H  | -2.264640 | 1.932806  | 1.124517  |
| H  | -2.515676 | 2.126002  | -0.474911 |
| H  | -0.324283 | -1.111465 | -0.676907 |
| H  | 0.350894  | -1.102483 | 0.809494  |
| C  | -2.659194 | 0.152207  | 0.143359  |
| C  | -1.701807 | -0.815471 | 0.841727  |
| C  | -4.067388 | 0.063320  | 0.734509  |
| H  | -2.692967 | -0.114639 | -0.925684 |
| C  | -2.229010 | -2.250683 | 0.794795  |
| H  | -1.603071 | -0.498640 | 1.892977  |
| C  | -4.598947 | -1.373782 | 0.694299  |
| H  | -4.031462 | 0.415246  | 1.781266  |
| H  | -4.738713 | 0.745294  | 0.189291  |
| C  | -3.638060 | -2.342168 | 1.390800  |
| H  | -1.532436 | -2.914668 | 1.330622  |
| H  | -2.248688 | -2.586110 | -0.257569 |
| H  | -5.594540 | -1.415178 | 1.163108  |
| H  | -4.731803 | -1.682946 | -0.357380 |
| H  | -4.009508 | -3.375905 | 1.312979  |
| H  | -3.593024 | -2.103078 | 2.467908  |

Trigonal-planar

$\eta^1(\text{C})$  carbon dioxide radical anion

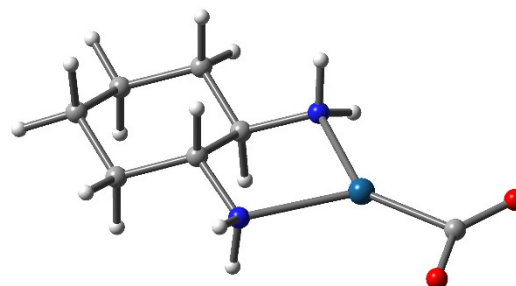

HOTO

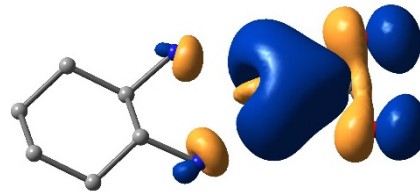

LUTO

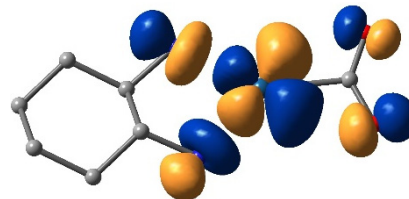

## References

- 1 X. Yin, J. Wang and S. F. Shen, *J. Chem. Eng. Data*, 2024, **69**, 1668-1676.
- 2 S. Straub and P. Vöhringer, *Phys. Chem. Chem. Phys.*, 2021, **23**, 17826-17835.
- 3 K. Yamaguchi, F. Jensen, A. Dorigo and K. N. Houk, *Chem. Phys. Lett.*, 1988, **149**, 537-542.
